# Supplementary material
Source: Elsevier journal article supplement (https://www.sciencedirect.com/science/article/pii/S2013524615000227)
Supplement: mmc1 [file S2013524615000227:mmc1.pdf]

## **CONSENTIMIENTO INFORMADO PARA LOS FAMILIARES**

### ***INFORMACIÓN A LOS PARTICIPANTES EN LA ENCUESTA***

#### ***Satisfacción de los familiares de personas con demencia después de una intervención educativa Enfermera en el EAIA de Patología Cognitiva***

*La investigadora principal de este estudio es Vanessa González, enfermera del CSS Albada (T. 937231010- extensión 25409).*

En primer lugar, agradecerle su colaboración por aceptar participar en este estudio sobre la atención a las personas con demencia.

Esperamos entrevistar a unas "X" personas que como usted han recibido esta intervención educativa por parte de enfermería.

En el plazo máximo de 15 días nos pondremos en contacto con usted telefónicamente para realizarle una encuesta que tendrá una duración aproximada de 10 minutos.

Este estudio tiene como objetivo conocer el grado de satisfacción de los familiares de pacientes afectados de demencia después de recibir educación sanitaria por parte de enfermería.

El proceso será estrictamente confidencial. El nombre del paciente y de los familiares no se utilizará en ningún informe cuando se obtengan los resultados. La información será confidencial y no se hará otro uso de ésta cumpliendo la Lei orgánica de Protección de datos 15/1999.

Si usted tiene dudas respecto el proyecto, podrá realizar las preguntas que se le generen en cualquier momento durante su participación.

Tendrá derecho a retirarse del estudio, si en algún momento de la entrevista se siente incomodo con las preguntas que le realizan, sin que esto le perjudique de ninguna manera.

El estudio no comporta ningún riesgo o beneficio ni para el paciente ni para el participante.

No se percibe ninguna compensación económica por la participación. Con estos conocimiento esperamos identificar áreas de mejora con la intención de ofrecer una atención de calidad centrada en el paciente y la su familia.

Yo, \_\_\_\_\_, he sido informado y acepto voluntariamente participar en este estudio.

Firma,

A \_\_\_\_\_, de \_\_\_\_\_ de 2013.

☐ Copia para el estudio

☐ Copia para el entrevistado
