# Supplementary material
Source: Elsevier journal article supplement (https://www.sciencedirect.com/science/article/pii/S2013524615000227)
Supplement: mmc3 [file S2013524615000227:mmc3.pdf]

## ESCALA DE DETERIORO GLOBAL (GDS-FAST)

| Estadio                                      | Fase clínica                                             | Características FAST                                                                                                                                                                                                                                                                                                                                                                                                                                                                                             | Comentarios                                                                                                                                                                                                                                                                                                                                                                                                                                                                                                                                                                                                                                                                                                                                 |
|----------------------------------------------|----------------------------------------------------------|------------------------------------------------------------------------------------------------------------------------------------------------------------------------------------------------------------------------------------------------------------------------------------------------------------------------------------------------------------------------------------------------------------------------------------------------------------------------------------------------------------------|---------------------------------------------------------------------------------------------------------------------------------------------------------------------------------------------------------------------------------------------------------------------------------------------------------------------------------------------------------------------------------------------------------------------------------------------------------------------------------------------------------------------------------------------------------------------------------------------------------------------------------------------------------------------------------------------------------------------------------------------|
| GDS 1. Ausencia de déficit cognitivo         | Normal<br>MEC: 30-35                                     | Ausencia de déficit funcionales objetivos o subjetivos.                                                                                                                                                                                                                                                                                                                                                                                                                                                          | No hay deterioro cognitivo subjetivo ni objetivo                                                                                                                                                                                                                                                                                                                                                                                                                                                                                                                                                                                                                                                                                            |
| GDS 2. Déficit cognitivo muy leve            | Normal para su edad. Olvido<br>MEC: 25-30                | Déficit funcional subjetivo                                                                                                                                                                                                                                                                                                                                                                                                                                                                                      | Quejas de pérdida de memoria en ubicación de objetos, nombres de personas, citas, etc.<br>No se objetiva déficit en el examen clínico ni en su medio laboral o situaciones sociales.<br>Hay pleno conocimiento y valoración de la sintomatología.                                                                                                                                                                                                                                                                                                                                                                                                                                                                                           |
| GDS 3. Déficit cognitivo leve                | Deterioro límite<br>MEC: 20-27                           | Déficit en tareas ocupacionales y sociales complejas y que generalmente lo observan familiares y amigos                                                                                                                                                                                                                                                                                                                                                                                                          | Primeros defectos claros. Manifestación en una o más de estas áreas: <ul style="list-style-type: none"> <li>• Haberse perdido en un lugar no familiar</li> <li>• Evidencia de rendimiento laboral pobre</li> <li>• Dificultad para recordar palabras y nombres</li> <li>• tras la lectura retiene escaso material</li> <li>• olvida la ubicación, pierde o coloca erróneamente objetos de valor</li> <li>• escasa capacidad para recordar a personas nuevas que ha conocido</li> </ul> El déficit de concentración es evidente para el clínico en una entrevista exhaustiva.<br>La negación como mecanismo de defensa, o el desconocimiento de los defectos, empieza a manifestarse.<br>Los síntomas se acompañan de ansiedad leve moderada |
| GDS 4. Déficit cognitivo moderado            | Enfermedad de Alzheimer leve<br>MEC: 16-23               | Déficits observables en tareas complejas como el control de los aspectos económicos personales o planificación de comidas cuando hay invitados                                                                                                                                                                                                                                                                                                                                                                   | Defectos manifiestos en: <ul style="list-style-type: none"> <li>• olvido de hechos cotidianos o recientes</li> <li>• déficit en el recuerdo de su historia personal</li> <li>• dificultad de concentración evidente en operaciones de resta de 7 en 7.</li> <li>• incapacidad para planificar viajes, finanzas o actividades complejas</li> </ul> Frecuentemente no hay defectos en: <ul style="list-style-type: none"> <li>• orientación en tiempo y persona</li> <li>• reconocimiento de caras y personas familiares</li> <li>• capacidad de viajar a lugares conocidos</li> </ul> Labilidad afectiva<br>Mecanismo de negación domina el cuadro                                                                                           |
| GDS 5. Déficit cognitivo moderadamente grave | Enfermedad de Alzheimer moderada<br>MEC: 10-19           | Decremento de la habilidad en escoger la ropa adecuada en cada estación del año o según las ocasiones                                                                                                                                                                                                                                                                                                                                                                                                            | Necesita asistencia en determinadas tareas, no en el aseo ni en la comida, pero sí para elegir su ropa<br>Es incapaz de recordar aspectos importantes de su vida cotidiana (dirección, teléfono, nombres de familiares)<br>Es frecuente cierta desorientación en tiempo o en lugar<br>Dificultad para contar en orden inverso desde 40 de 4 en 4, o desde 20 de 2 en 2<br>Sabe su nombre y generalmente el de su esposa e hijos                                                                                                                                                                                                                                                                                                             |
| GDS 6. Déficit cognitivo grave               | Enfermedad de Alzheimer moderadamente grave<br>MEC: 0-12 | Decremento en la habilidad para vestirse, bañarse y lavarse; específicamente, pueden identificarse 5 subestadios siguientes: <ol style="list-style-type: none"> <li>a) disminución de la habilidad de vestirse solo</li> <li>b) disminución de la habilidad para bañarse solo</li> <li>c) disminución de la habilidad para lavarse y arreglarse solo</li> <li>d) disminución de la continencia urinaria</li> <li>e) disminución de la continencia fecal</li> </ol>                                               | Olvida a veces el nombre de su esposa de quien depende para vivir<br>Retiene algunos datos del pasado<br>Desorientación temporo espacial<br>Dificultad para contar de 10 en 10 en orden inverso o directo<br>Puede necesitar asistencia para actividades de la vida diaria<br>Puede presentar incontinencia<br>Recuerda su nombre y diferencia los familiares de los desconocidos<br>Ritmo diurno frecuentemente alterado<br>Presenta cambios de la personalidad y la afectividad (delirio, síntomas obsesivos, ansiedad, agitación o agresividad y abulia cognoscitiva)                                                                                                                                                                    |
| GDS 7. Déficit cognitivo muy grave           | Enfermedad de Alzheimer grave<br>MEC: 0                  | Pérdida del habla y la capacidad motora<br>Se especifican 6 subestadios: <ol style="list-style-type: none"> <li>a) capacidad de habla limitada aproximadamente a 6 palabras</li> <li>b) capacidad de habla limitada a una única palabra</li> <li>c) pérdida de la capacidad para caminar solo sin ayuda</li> <li>d) pérdida de la capacidad para sentarse y levantarse sin ayuda</li> <li>e) pérdida de la capacidad para sonreír</li> <li>f) pérdida de la capacidad para mantener la cabeza erguida</li> </ol> | Perdida progresiva de todas las capacidades verbales<br>Incontinencia urinaria<br>Necesidad de asistencia a la higiene personal y alimentación<br>Pérdida de funciones psicomotoras como la deambulaci3n<br>Con frecuencia se observan signos neurol3gicos                                                                                                                                                                                                                                                                                                                                                                                                                                                                                  |
